# Supplementary material for: The impact of the combination of KIT mutation and minimal residual disease on outcome in t(8;21) acute myeloid leukemia
Source: PubMed Central journal article supplement (PMC8016839; doi:10.1038/s41408-021-00461-z), 2021-04-01
Supplement: 41408_2021_461_MOESM1_ESM.pdf [file 41408_2021_461_MOESM1_ESM.pdf]

## Supplement

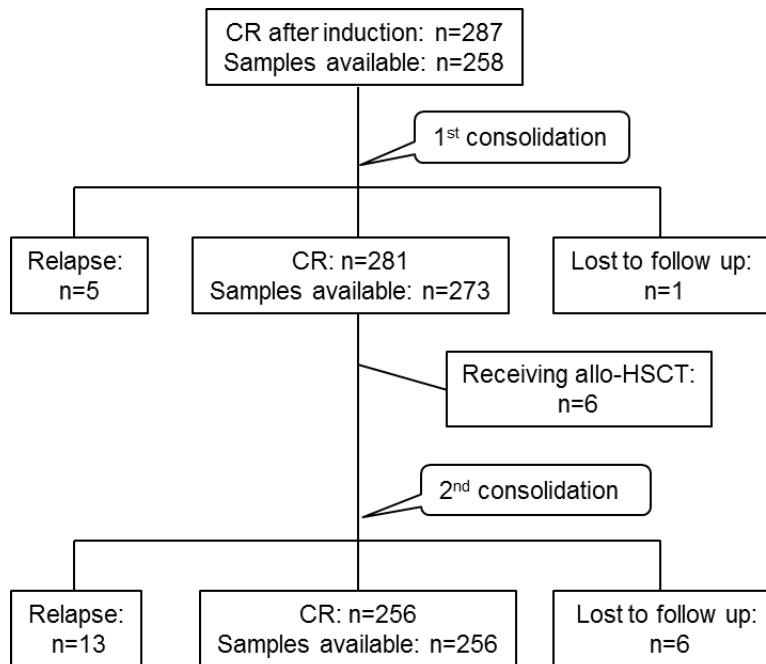

**Figure S1.** The flowchart of patient treatment and samples availability for the detection of *RUNX1-RUNX1* transcript before 2<sup>nd</sup> consolidation. 189 patients (65.9%) once included in our previous study which investigated the prognosis of the subtypes of *KIT* mutations (Reference 10) and their data were updated in the current study.

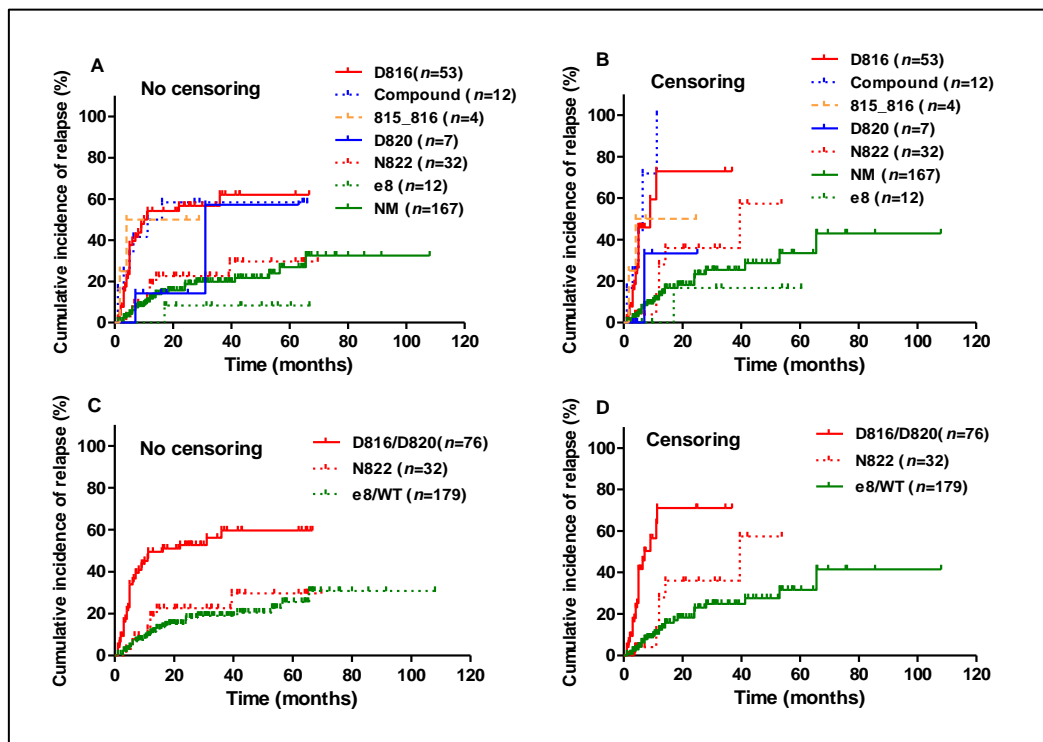

**Figure S2.** CIR of patients categorized by the *KIT* mutation status. A and C: all patients with no censoring; B and D: patients receiving allo-HSCT were censored at the time of receiving transplantation.

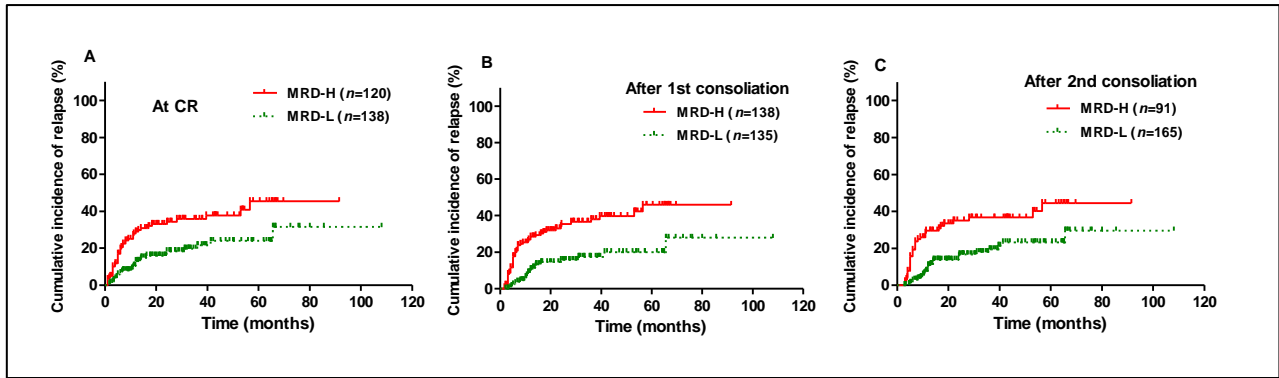

**Figure S3.** CIR of patients categorized by MRD status at different timepoints. A: at CR; B: after 1<sup>st</sup> consolidation; C: after 2<sup>nd</sup> consolidation. MRD-H and MRD-L represented <2-log reduction and  $\geq$ 2-log reduction of RUNX1-RUNX1T1 at CR (A) and <3-log reduction and  $\geq$ 3-log reduction of RUNX1-RUNX1T1 after 1<sup>st</sup> and 2<sup>nd</sup> consolidation (B and C), respectively.
